# Supplementary material for: Nuclear lamin A/C harnesses the perinuclear apical actin cables to protect nuclear morphology
Source: PubMed Central journal article supplement (PMC5730574; doi:10.1038/s41467-017-02217-5), 2017-12-14
Supplement: 41467_2017_2217_MOESM2_ESM.pdf [file 41467_2017_2217_MOESM2_ESM.pdf]

**Editorial Note:** this manuscript has been previously reviewed at another journal that is not operating a transparent peer review scheme. This document only contains reviewer comments and rebuttal letters for versions considered at Nature Communications.

REVIEWERS' COMMENTS:

Reviewer #1 (Remarks to the Author):

**Editorial Note:** this Reviewer provided no further comments to the authors.
