# Supplementary material for: Nuclear lamin A/C harnesses the perinuclear apical actin cables to protect nuclear morphology
Source: PubMed Central journal article supplement (PMC5730574; doi:10.1038/s41467-017-02217-5), 2017-12-14
Supplement: 41467_2017_2217_MOESM3_ESM.pdf [file 41467_2017_2217_MOESM3_ESM.pdf]

## **Description of Additional Supplementary Files**

### **File Name: Supplementary Movie 1**

Description: Dynamic changes in cell orientation and cytoskeletal reorganization under uniaxial cyclic stretching of the substrate. EGFP-LifeAct-transfected mouse embryonic fibroblasts seeded onto the PDMS thin film were re-oriented in response to the substrate stretching (8% strain ratio and 1Hz frequency) by the reorganization of actin cytoskeleton perpendicular to the substrate stretching direction. Each frame was collected every 2 min for 1 h.
